Vann *et al.*: Variation in teosinte at the *tb1* locus

# Natural variation in teosinte at the domestication locus *teosinte branched1* (*tb1*)<sup>1</sup>

Laura Vann<sup>1</sup>, Thomas Kono<sup>1,2</sup>, Tanja Pyhäjärvi<sup>1,3</sup>, Matthew B. Hufford<sup>1,4,6</sup>, and Jeffrey Ross-Ibarra<sup>1,5,6</sup>

<sup>1</sup>Department of Plant Sciences, University of California Davis

<sup>2</sup>Department of Agronomy and Plant Genetics, University of Minnesota Twin Cities

<sup>3</sup>Department of Biology, University of Oulu

<sup>4</sup>Department of Ecology, Evolution, and Organismal Biology, Iowa State University

<sup>5</sup>Center for Population Biology and Genome Center, University of California Davis

<sup>6</sup>Author for Correspondence

---

1

Manuscript received \_\_\_\_\_; revision accepted \_\_\_\_\_.

## Acknowledgements

The authors thank the Department of Plant Sciences at UC Davis for graduate student research funding to LEV and for research funds supporting the project, UC Mexus for a postdoctoral scholar grant to MBH and JR-I, and G. Coop for helpful discussion.

# 1 Abstract

2 *Premise of the study:* The *teosinte branched1* (*tb1*) gene is a major QTL controlling branching  
3 differences between maize and its wild progenitor, teosinte. The insertion of a transposable  
4 element (*Hopscotch*) upstream of *tb1* is known to enhance the gene's expression, causing reduced  
5 tillering in maize. Observations of the maize *tb1* allele in teosinte and estimates of an insertion  
6 age of the *Hopscotch* that predates domestication led us to investigate its prevalence and  
7 potential role in teosinte.

8 *Methods:* Prevalence of the *Hopscotch* element was assessed across an Americas-wide sample of  
9 837 maize and teosinte individuals using a co-dominant PCR assay. Population genetic summaries  
10 were calculated for a subset of individuals from four teosinte populations in central Mexico.  
11 Phenotypic data were also collected using seed from a single teosinte population where *Hopscotch*  
12 was found segregating at high frequency.

13 *Key results:* Genotyping results indicate the *Hopscotch* element is found in a number of teosinte  
14 populations and linkage disequilibrium near *tb1* does not support recent introgression from maize.  
15 Population genetic signatures are consistent with selection on this locus revealing a potential  
16 ecological role for *Hopscotch* in teosinte, but a greenhouse experiment does not detect a strong  
17 association between *tb1* and tillering in teosinte.

18 *Conclusions:* Our findings suggest the role of *Hopscotch* differs between maize and teosinte.  
19 Future work should assess *tb1* expression levels in teosinte with and without the *Hopscotch* and  
20 more comprehensively phenotype teosinte to assess the ecological significance of the *Hopscotch*  
21 insertion and, more broadly, the *tb1* locus in teosinte.

22 **Key words:** domestication; maize; teosinte; *teosinte branched1*; transposable element

# INTRODUCTION

Domesticated crops and their wild progenitors provide an excellent system in which to study adaptation and genomic changes associated with human-mediated selection (Ross-Ibarra et al., 2007). Plant domestication usually involves a suite of phenotypic changes such as loss of seed shattering and increased fruit or grain size, which are commonly referred to as the ‘domestication syndrome’ (Olsen and Wendel, 2013), and much of the study of domestication has focused on understanding the genetic variation underlying these traits (Olsen and Gross, 2010). Because most domesticates show reduced genetic diversity relative to their wild counterparts, effort has been made to identify agronomically useful variation in crop wild relatives (Flint-Garcia et al., 2009). Often, after identification, the alleles conferring these beneficial traits are bred into domesticates for crop improvement. For example, *Oryza rufipogon*, the wild progenitor of domesticated rice, has proven useful for the integration of a number of beneficial QTL controlling traits such as grain size and yield into domesticated rice (Kovach and McCouch, 2008). In addition to researching the role of wild alleles in domesticates, researchers have also investigated the role of variation in domesticated taxa in the evolution of feral and weedy populations (Ellstrand et al., 2010). But even though domesticated alleles are often found segregating in wild relatives (Gallavotti et al., 2004; Sigmon and Vollbrecht, 2010), we know almost nothing about the ecological role of this variation in natural populations. In this paper we present an ecological genetic analysis of the domestication locus *tb1*, and specifically the domesticated haplotype at *tb1*, in natural populations of the wild ancestor of domesticated maize.

Maize (*Zea mays* ssp. *mays*) was domesticated from the teosinte *Zea mays* ssp. *parviglumis* (hereafter, *parviglumis*) roughly 9,000 B.P. in southwest Mexico (Piperno et al., 2009; Matsuoka et al., 2002). Maize and the teosintes are an attractive system in which to study domestication due to the abundance of genetic tools developed for maize and well-characterized domestication loci (Hufford et al., 2012a; Doebley, 2004; Hufford et al., 2012b). Additionally, large, naturally-occurring populations of both *parviglumis* and the highland teosinte *Zea mays* ssp. *mexicana* (hereafter, *mexicana*) can be found throughout Mexico (Wilkes, 1977; Hufford et al., 2013), and genetic diversity of these taxa is estimated to be high (Ross-Ibarra et al., 2009).

Many morphological changes are associated with maize domestication, and understanding the genetic basis of these changes has been a focus of maize research for a number of years (Doebley, 2004). One of the most dramatic changes is found in plant architecture: domesticated maize is

1 characterized by a central stalk with few tillers and lateral branches terminating in a female  
 2 inflorescence, while teosinte is highly tillered and bears tassels (male inflorescences) at the end of  
 3 its lateral branches. The *teosinte branched1* (*tb1*) gene, a repressor of organ growth, was  
 4 identified as a major QTL involved in branching (Doebley et al., 1995) and tillering (Doebley and  
 5 Stec, 1991) differences between maize and teosinte. A 4.9 kb retrotransposon (*Hopscotch*)  
 6 insertion into the upstream control region of *tb1* in maize acts to enhance expression of *tb1*, thus  
 7 repressing lateral organ growth (Doebley et al., 1997; Studer et al., 2011). Dating of the  
 8 *Hopscotch* retrotransposon suggests that its insertion predates the domestication of maize, leading  
 9 to the hypothesis that it was segregating as standing variation in populations of teosinte and  
 10 increased to high frequency in maize due to selection during domestication (Studer et al., 2011).  
 11 The effects of the *Hopscotch* insertion have been studied in maize (Studer et al., 2011), and  
 12 analysis of teosinte alleles at *tb1* has identified functionally distinct allelic classes (Studer and  
 13 Doebley, 2012), but little is known about the role of *tb1* or the *Hopscotch* insertion in natural  
 14 populations of teosinte. Previous studies have confirmed the presence of the *Hopscotch* in samples  
 15 of *parviglumis*, *mexicana*, and landrace maize; however little is known about the frequency with  
 16 which the *Hopscotch* is segregating in natural populations.

17 In teosinte and other plants that grow at high population density, individuals detect  
 18 competition from neighbors via the ratio of red to far-red light. An increase in far-red relative to  
 19 red light accompanies shading and triggers the shade avoidance syndrome, a suite of physiological  
 20 and morphological changes such as reduced tillering, increased plant height and early flowering  
 21 (Kebrom and Brutnell, 2007). The *tb1* locus appears to play an important role in the shade  
 22 avoidance pathway in *Zea mays* (Lukens and Doebley, 1999) and other grasses (Kebrom and  
 23 Brutnell, 2007) via changes in expression levels in response to shading. Lukens and Doebley  
 24 (1999) introgressed the teosinte *tb1* allele into a maize inbred background and noted that under  
 25 low density conditions plants were highly tillered but that under high density, plants showed  
 26 significantly reduced tillers and grew taller. Based on these results we hypothesize that the  
 27 *Hopscotch* (*i.e.*, the domesticated allele) at *tb1* may play a role in the ecology of teosinte,  
 28 especially in high-density populations. In this study we aim to characterize the distribution of the  
 29 *Hopscotch* insertion in *parviglumis*, *mexicana*, and landrace maize, and to examine the phenotypic  
 30 effects of the insertion in *parviglumis*. We use a combination of PCR genotyping for the  
 31 *Hopscotch* element in our full panel and sequencing of two small regions upstream of *tb1*

1 combined with a larger SNP dataset in a subset of teosinte populations to explore patterns of

genetic variation at this locus. Finally, we test for an association between the *Hopscotch* element and tillering phenotypes in samples from a natural population of *parviglumis*.

## MATERIALS AND METHODS

**Sampling and genotyping**—We sampled 1,110 individuals from 350 accessions (247 maize landraces, 17 *mexicana* populations, and 86 *parviglumis* populations; ranging from 1-38 individuals per population, with an average of 11 individuals per population for *parviglumis* and *mexicana* and 2 individuals per landrace accession) and assessed the presence or absence of the *Hopscotch* insertion (Appendix 1 and Appendix 2, See Supplemental Materials with the online version of this article). DNA was extracted from leaf tissue using a modified CTAB approach (Doyle and Doyle, 1990; Maloof et al., 1984). We designed primers using PRIMER3 (Rozen and Skaletsky, 2000) implemented in Geneious (Kearse et al., 2012) to amplify the entire *Hopscotch* element, as well as an internal primer allowing us to simultaneously check for possible PCR bias between presence and absence of the *Hopscotch* insertion due to its large size (~5kb). Two PCRs were performed for each individual, one with primers flanking the *Hopscotch* (HopF/HopR) and one with a flanking primer and an internal primer (HopF/HopIntR). Primer sequences are HopF, 5'-TCGTTGATGCTTTGATGGATGG-3'; HopR, 5'-AACAGTATGATTTTCATGGGACCG-3'; and HopIntR, 5'-CCTCCACCTCTCATGAGATCC-3' (Appendix 3 and Appendix 4, See Supplemental Materials with the online version of this article). Homozygotes show a single band for absence of the element (~300bp) and two bands for presence of the element (~5kb, amplification of the entire element, and ~1.1kb, amplification of part of the element), whereas heterozygotes show all three bands (Appendix 2, See Supplemental Materials with the online version of this article). Since we developed a PCR protocol for each allele, if only one PCR resolved well, we scored one allele for that individual rather than infer the diploid genotype. We used Phusion High Fidelity Enzyme (Thermo Fisher Scientific Inc., Waltham, Massachusetts, USA) and the following conditions for amplifications: 98°C for 3 min, 30 cycles of 98°C for 15 s, 65°C for 30 s, and 72°C for 3 min 30 s, with a final extension of 72°C for 10 min. PCR products were visualized on a 1% agarose gel and scored for presence/absence of the *Hopscotch* based on band size.

**Genotyping analysis**—To calculate differentiation between populations ( $F_{ST}$ ) and subspecies ( $F_{CT}$ ) we used HierFstat (Goudet, 2005). These analyses only included populations ( $n = 32$ ) in which eight or more chromosomes were sampled. To test the hypothesis that the *Hopscotch* insertion may be adaptive under certain environmental conditions, we looked for

significant associations between *Hopscotch* frequency and environmental variables using the software BayEnv (Coop et al., 2010). BayEnv creates a covariance matrix of relatedness between populations and then tests a null model that allele frequencies in populations are determined by the covariance matrix of relatedness alone against the alternative model that allele frequencies are determined by a combination of the covariance matrix and an environmental variable, producing a posterior probability (*i.e.*, Bayes Factor; Coop et al. 2010). We used teosinte (*ssp. parviglumis* and *ssp. mexicana*) genotyping and covariance data from Pyhäjärvi et al. (2013) for BayEnv, with the *Hopscotch* insertion coded as an additional biallelic marker. SNP data from Pyhäjärvi et al. (2013) were obtained using the MaizeSNP50 BeadChip and Infinium HD Assay (Illumina, San Diego, CA, USA). Environmental data were obtained from [www.worldclim.org](http://www.worldclim.org) and soil data were downloaded from the Harmonized World Soil Database (FAO/IIASA/ISRIC/ISSCAS/JRC, 2012) at [www.harvestchoice.org](http://www.harvestchoice.org). Environmental data represent average values for the last several decades (climatic data) or are likely stable over time (soil data) and therefore represent conditions important for local adaptation of our samples. Information from these data sets was summarized by principle component analysis following Pyhäjärvi et al. (2013).

**Sequencing**—In addition to genotyping, we chose a subset of *parviglumis* individuals for sequencing. We chose twelve individuals from each of four populations from Jalisco state, Mexico (San Lorenzo, La Mesa, Ejutla A, and Ejutla B). For amplification and sequencing, we selected two regions approximately 600bp in size from within the 5' UTR of *tb1* (Region 1) and from 1,235bp upstream of the start of the *Hopscotch* (66,169bp upstream from the start of the *tb1* ORF; Region 2). We designed the following primers using PRIMER3 (Rozen and Skaletsky, 2000): for the 5' UTR, 5'-GGATAATGTGCACCAGGTGT-3' and 5'-GCGTGCTAGAGACACYTGTGCT-3'; for the 66kb upstream region, 5'-TGTCCTCGCCGCAACTC-3' and 5'-TGTACGCCCGCCCTCATCA-3' (Appendix 1, See Supplemental Materials with the online version of this article). We used Taq polymerase (New England Biolabs Inc., Ipswich, Massachusetts, USA) and the following thermal cycler conditions to amplify fragments: 94°C for 3 min, 30 cycles of 92°C for 40 s, annealing for 1 min, 72°C for 40 s, and a final 10 min extension at 72°C. Annealing temperatures for Region 1 and Region 2 were 59.7°C and 58.8°C, respectively. To clean excess primer and dNTPs we added two units of Exonuclease1 and 2.5 units of Antarctic Phosphatase to 8.0  $\mu$ L of amplification product. This mix was placed on a thermal cycler with the following program: 37°C for 30 min, 80°C for 15 min, and a final cool-down step to 4°C.

We cloned cleaned fragments into a TOPO-TA vector (Life Technologies, Grand Island, New

York, USA) using OneShot TOP10 chemically competent *E. coli* cells, with an extended ligation time of 30 min for a complex target fragment. We plated cells on LB agar plates containing kanamycin, and screened colonies using vector primers M13 Forward and M13 Reverse under the following conditions: 96°C for 5 min; then 35 cycles at 96°C for 30 s, 53°C for 30 s, 72°C for 2 min; and a final extension at 72°C for 4 min. We visualized amplification products for incorporation of our insert on a 1% agarose TAE gel.

Amplification products with successful incorporation of our insert were cleaned using Exonuclease 1 and Antarctic Phosphatase following the procedures detailed above, and sequenced with vector primers M13 Forward and M13 Reverse using Sanger sequencing at the College of Agriculture and Environmental Sciences (CAES) sequencing center at UC Davis. We aligned and trimmed primer sequences from resulting sequences using the software Geneious (Kearse et al., 2012). Following alignment, we verified singleton SNPs by sequencing an additional one to four colonies from each clone. If the singleton was not present in these additional sequences it was considered an amplification or cloning error, and we replaced the base with the base of the additional sequences. If the singleton appeared in at least one of the additional sequences we considered it a real variant and kept it for further analyses.

**Sequence analysis**—For population genetic analyses of sequenced Region 1 and sequenced Region 2 we used the Libsequence package (Thornton, 2003) to calculate pairwise  $F_{ST}$  between populations and to calculate standard diversity statistics (number of haplotypes, haplotype diversity, Watterson’s estimator  $\hat{\theta}_W$ , pairwise nucleotide diversity  $\hat{\theta}_\pi$ , and Tajima’s D). To produce a visual representation of differentiation between sequences and examine patterns in sequence clustering by *Hopscotch* genotype we used Phylip (<http://evolution.genetics.washington.edu/phylip.html>) to create neighbor-joining trees with bootstrap-supported nodes (100 repetitions). For creation of trees we also included homologous sequence data from Maize HapMapV2 (Chia et al., 2012) for teosinte inbred lines (TILs), some of which are known to be homozygous for the *Hopscotch* insertion (TIL03, TIL17, TIL09), as well as 59 lines of domesticated maize.

**Introgression analysis**—In order to assess patterns of linkage disequilibrium (LD) around the *Hopscotch* element in the context of chromosomal patterns of LD we used Tassel (Bradbury et al., 2007) and calculated LD between SNPs across chromosome 1 using previously published data from twelve plants each of the Ejutla A (EjuA), Ejutla B (EjuB), San Lorenzo (SLO), and La Mesa (MSA) populations (Pyhäjärvi et al., 2013). We chose these populations because we had



both genotyping data for the *Hopscotch* as well as chromosome-wide SNP data for chromosome 1. For each population we filtered the initial set of 5,897 SNPs on chromosome 1 to accept only SNPs with a minor allele frequency of at least 0.1, resulting in 1,671, 3,023, 3,122, and 2,167 SNPs for SLO, EjuB, EjuA, and MSA, respectively. We then used Tassel (Bradbury et al., 2007) to calculate linkage disequilibrium ( $r^2$ ) across chromosome 1 for each population.

We examined evidence of introgression on chromosome 1 in these same four populations (EjuA, EjuB, MSA, SLO) using STRUCTURE (Falush et al., 2003) and phased data from Pyhäjärvi et al. (2013), combined with the corresponding SNP data from a diverse panel of 282 maize lines (Cook et al., 2012). SNPs were anchored in a modified version of the IBM genetic map (Gerke et al., 2013). Since STRUCTURE does not account for LD due to physical linkage we created haplotype blocks using a custom Perl script from Hufford et al. (2013, code available at <http://dx.doi.org/10.6084/m9.figshare.1165577>). In maize, LD decays over an average distance of 5500bp (Chia et al., 2012); because LD decay is even more rapid in teosinte (Chia et al., 2012) we used a conservative haplotype block size of 5kb. We ran STRUCTURE at K=2 under the linkage model, performing 3 replicates with an MCMC burn-in of 10,000 steps and 50,000 steps post burn-in.

**Phenotyping of *parviglumis***—To investigate the phenotypic effects of the *Hopscotch* insertion in teosinte we conducted a phenotyping trial in which we germinated 250 seeds of *parviglumis* collected in Jalisco state, Mexico (population San Lorenzo; Hufford 2010) where the *Hopscotch* insertion is segregating at highest frequency (0.44) in our initial genotyping sample set. In order to maximize the likelihood of finding the *Hopscotch* in our association population we selected seeds from sites within the population where genotyped individuals were homozygous or heterozygous for the insertion. We chose between 10-13 seeds from each of 23 sampling sites. We treated seeds with Captan fungicide (Southern Agricultural Insecticides Inc., Palmetto, Florida, USA) and germinated them in petri dishes with filter paper. Following germination, 206 successful germinations were planted into one-gallon pots with potting soil and randomly spaced one foot apart on greenhouse benches. Plants were watered three times a day with an automatic drip containing 10-20-10 fertilizer, which was supplemented with hand watering on extremely hot and dry days.

Starting on day 15, we measured tillering index as the ratio of the sum of tiller lengths to the height of the plant (Briggs et al., 2007). Following initial measurements, we phenotyped plants for tillering index every 5 days through day 40, and then on day 50 and day 60. On day 65 we

measured culm diameter between the third and fourth nodes of each plant. Following phenotyping we extracted DNA from all plants using a modified SDS extraction protocol. We genotyped individuals for the *Hopscotch* insertion following the PCR protocols listed above. Tillering index data for each genotypic class did not meet the criteria for a repeated measures ANOVA, so we transformed the data with a Box-Cox transformation ( $\lambda = 0$ ) in the Car Package for R (Fox and Weisberg, 2011) to improve the normality and homogeneity of variance among genotype classes. We analyzed relationships between genotype and tillering index and tiller number using a repeated measures ANOVA through a general linear model function implemented in SAS v.9.3 (SAS Institute Inc., Cary, NC, USA). Additionally, in order to compare any association between *Hopscotch* genotype and tillering and associations at other presumably unrelated traits, we performed an ANOVA between culm diameter and genotype using the same general linear model in SAS. Culm diameter is not believed to be correlated with tillering index or variation at *tb1* and is used as our independent trait for phenotyping analyses. SAS code used for analysis is available at <http://dx.doi.org/10.6084/m9.figshare.1166630>.

# RESULTS

**Genotyping**—The genotype at the *Hopscotch* insertion was confirmed with two PCRs for 837 individuals of the 1,100 screened. Among the 247 maize landrace accessions genotyped, all but eight were homozygous for the presence of the insertion (Appendix 1 and Appendix 2, See Supplemental Materials with the online version of this article). Within our *parviglumis* and *mexicana* samples we found the *Hopscotch* insertion segregating in 37 ( $n = 86$ ) and four ( $n = 17$ ) populations, respectively, and at highest frequency within populations in the states of Jalisco, Colima, and Michoacán in central-western Mexico (Fig. 1). Using our *Hopscotch* genotyping, we calculated differentiation between populations ( $F_{ST}$ ) and subspecies ( $F_{CT}$ ) for populations in which we sampled eight or more individuals. We found that  $F_{CT} = 0$ , and levels of  $F_{ST}$  among populations within each subspecies (0.22) and among all populations (0.23) are similar to genome-wide estimates from previous studies (Pyhäjärvi et al. 2013; Table 1). Although we found large variation in *Hopscotch* allele frequency among our populations, BayEnv analysis did not indicate a correlation between the *Hopscotch* insertion and environmental variables (all Bayes Factors  $< 1$ ).

**Sequencing**—To investigate patterns of sequence diversity and linkage disequilibrium (LD) in the *tb1* region, we sequenced two small ( $< 1$ kb) regions upstream of the *tb1* ORF in four

1 populations. After alignment and singleton checking we recovered 48 and 40 segregating sites for  
2 the 5' UTR region (Region 1) and the 66kb upstream region (Region 2), respectively. For Region  
3 1, Ejutla A has the highest values of haplotype diversity and  $\theta_\pi$ , while Ejutla B and La Mesa have  
4 comparable values of these summary statistics, and San Lorenzo has much lower values.  
5 Additionally, Tajima's D is strongly negative in the two Ejutla populations and La Mesa, but is  
6 closer to zero in San Lorenzo (Table 2, Appendix 2, See Supplemental Materials with the online  
7 version of this article). For Region 2, haplotype diversity and  $\theta_\pi$ , are similar for Ejutla A and  
8 Ejutla B, while La Mesa and San Lorenzo have slightly lower values for these statistics (Table 2).  
9 Tajima's D is positive in all populations except La Mesa, indicating an excess of low frequency  
10 variants in this population (Table 2). Pairwise values of  $F_{ST}$  within population pairs Ejutla  
11 A/Ejutla B and San Lorenzo/La Mesa are close to zero for both sequenced regions as well as for  
12 the *Hopscotch*, while they are high for other population pairs (Table 1). Neighbor joining trees of  
13 our sequence data and data from the teosinte inbred lines (TILs; data from Maize HapMapV2,  
14 Chia et al. 2012) do not reveal any clear clustering pattern with respect to population or  
15 *Hopscotch* genotype (Appendix 5, See Supplemental Materials with the online version of this  
16 article); individuals within our sample that have the *Hopscotch* insertion do not group with the  
17 teosinte inbred lines or domesticated maize that have the *Hopscotch* insertion.

18 **Evidence of introgression**—The highest frequency of the *Hopscotch* insertion in teosinte  
19 was found in *parviglumis* sympatric with cultivated maize. Our initial hypothesis was that the  
20 high frequency of the *Hopscotch* element in these populations could be attributed to introgression  
21 from maize into teosinte. To investigate this possibility we examined overall patterns of linkage  
22 disequilibrium across chromosome one and specifically in the *tb1* region. If the *Hopscotch* is found  
23 in these populations due to recent introgression we would expect to find large blocks of linked  
24 markers near this element. We find no evidence of elevated linkage disequilibrium between the  
25 *Hopscotch* and SNPs surrounding the *tb1* region in our resequenced populations (Figure 2), and  
26  $r^2$  in the *tb1* region does not differ significantly between populations with (average  $r^2$  of 0.085)  
27 and without (average  $r^2 = 0.082$ ) the *Hopscotch* insertion. In fact, average  $r^2$  is lower in the *tb1*  
28 region ( $r^2 = 0.056$ ) than across the rest of chromosome 1 ( $r^2 = 0.083$ ; Table 3).

29 The lack of clustering of *Hopscotch* genotypes in our NJ tree as well as the lack of LD around  
30 *tb1* do not support the hypothesis that the *Hopscotch* insertion in these populations of *parviglumis*  
31 is the result of recent introgression. However, to further explore this hypothesis we performed a  
32 STRUCTURE analysis using Illumina MaizeSNP50 data from four of our *parviglumis* populations

(EjuA, EjuB, MSA, and SLO) (Pyhäjärvi et al., 2013) and the maize 282 diversity panel (Cook et al., 2012). The linkage model implemented in STRUCTURE can be used to identify ancestry of blocks of linked variants which would arise as the result of recent admixture between populations. If the *Hopscotch* insertion is present in populations of *parviglumis* as a result of recent admixture with domesticated maize, we would expect the insertion and linked variants in surrounding sites to be assigned to the “maize” cluster in our STRUCTURE runs, not the “teosinte” cluster. In all runs, assignment to maize in the *tb1* region across all four *parviglumis* populations is low (average 0.017) and much below the chromosome-wide average (0.20; Table 4; Fig. 3).

**Phenotyping**—To assess the contribution of *tb1* to phenotypic variation in tillering in a natural population, we grew plants from seed sampled from the San Lorenzo population of *parviglumis*, which had a high mean frequency (0.44) of the *Hopscotch* insertion based on our initial genotyping. We measured tiller number and tillering index, the ratio of the sum of tiller lengths to plant height, for 206 plants from within the San Lorenzo population, and genotyped plants for the *Hopscotch* insertion. We also measured culm diameter, a phenotype that differs between maize and teosinte (Briggs et al., 2007) but is not thought to be affected by the *Hopscotch* insertion. Phenotypic data are available at <http://dx.doi.org/10.6084/m9.figshare.776926>. Our plantings produced 82 homozygotes for the *Hopscotch* insertion at *tb1*, 104 heterozygotes, and 20 homozygotes lacking the insertion; these numbers do not deviate from expectations of Hardy-Weinberg equilibrium. After performing a repeated measures ANOVA between our transformed tillering index data and *Hopscotch* genotype we find no significant correlation between genotype at the *Hopscotch* insertion and tillering index (Fig. 4), tiller number, or culm diameter. Only on day 40 did we observe a weak but statistically insignificant ( $r^2 = 0.02$ ,  $p = 0.0848$ ) correlation between tillering index and the *Hopscotch* genotype, although in the opposite direction of that expected, with homozygotes for the insertion showing a higher tillering index.

## DISCUSSION

Adaptation occurs due to selection on standing variation or *de novo* mutations. Adaptation from standing variation has been well-described in a number of systems; for example, selection for lactose tolerance in humans (Plantinga et al., 2012; Tishkoff et al., 2007), variation at the *Eda* locus in three-spined stickleback (Kitano et al., 2008; Colosimo et al., 2005), and pupal diapause in the Apple Maggot fly (Feder et al., 2003). Although the adaptive role of standing variation has

been described in many systems, its importance in domestication is not as well studied.

In maize, alleles at domestication loci (*RAMOSA1*, Sigmon and Vollbrecht 2010; *barren stalk1*, Gallavotti et al. 2004; and *grassy tillers1*, Whipple et al. 2011) are thought to have been selected from standing variation, suggesting that diversity already present in teosinte may have played an important role in maize domestication. The *teosinte branched1* gene is one of the best characterized domestication loci, and, while previous studies have suggested that differences in plant architecture between maize and teosinte are a result of selection on standing variation at this locus (Clark et al., 2006; Studer et al., 2011), much remains to be discovered regarding natural variation at this locus and its ecological role in teosinte.

Studer et al. (2011) genotyped 90 accessions of teosinte (inbred and outbred), providing the first evidence that the *Hopscotch* insertion is segregating in teosinte. Given that the *Hopscotch* insertion has been estimated to predate the domestication of maize, it is not surprising that it can be found segregating in populations of teosinte. However, by widely sampling across teosinte populations our study provides greater insight into the distribution and prevalence of the *Hopscotch* in teosinte. While our findings are consistent with Studer et al. (2011) in that we identify the *Hopscotch* allele segregating in teosinte, we find it at higher frequency than previously suggested. The *Hopscotch* allele is more prevalent in *parviglumis* than in *mexicana* in our sample (Appendix 1, See Supplemental Materials with the online version of this article), suggesting a different history of the allele amongst teosinte subspecies. Moreover, many of our *parviglumis* populations with a high frequency of the *Hopscotch* allele fall in the Jalisco cluster identified by Fukunaga et al. (2005), and further distinguish this region from the Balsas River Basin where maize was domesticated (Matsuoka et al., 2002). Potential explanations for the high frequency of the *Hopscotch* element in *parviglumis* from the Jalisco cluster include gene flow from maize, genetic drift, and natural selection.

While gene flow from crops into their wild relatives is well-known, (Ellstrand et al., 1999; Zhang et al., 2009; Thurber et al., 2010; Baack et al., 2008; Hubner et al., 2012; Wilkes, 1977; van Heerwaarden et al., 2011; Barrett, 1983), our results do not suggest introgression from maize at the *tb1* locus, and are more consistent with Hufford et al. (2013) who found resistance to introgression from maize into *mexicana* around domestication loci. Clustering in our NJ trees does not reflect the pattern expected if maize alleles at the *tb1* locus had introgressed into populations of teosinte. Moreover, there is no signature of elevated LD in the *tb1* region relative to the rest of chromosome 1, and Bayesian assignment to a maize cluster in this region is both low

and below the chromosome-wide average (Fig. 3, Table 4). Together, these data point to an explanation other than recent introgression for the high observed frequency of *Hopscotch* in the Jalisco cluster of our *parviglumis* populations.

Although recent introgression seems unlikely, we cannot rule out ancient introgression as an explanation for the presence of the *Hopscotch* in these populations. If the *Hopscotch* allele was introgressed in the distant past, recombination may have broken up LD, a process that would be consistent with our data. We find this scenario less plausible, however, as there is no reason why gene flow should have been high in the past but absent in present-day sympatric populations. In fact, early generation maize-teosinte hybrids are common in these populations today (MB Hufford, pers. observation), and genetic data support ongoing gene flow between domesticated maize and both *mexicana* and *parviglumis* in a number of sympatric populations (Hufford et al., 2013; Ellstrand et al., 2007; van Heerwaarden et al., 2011; Warburton et al., 2011).

Remaining explanations for differential frequencies of the *Hopscotch* among teosinte populations include both genetic drift and natural selection. Previous studies using both SSRs and genome-wide SNP data have found evidence for a population bottleneck in the San Lorenzo population (Hufford, 2010; Pyhäjärvi et al., 2013), and the lower levels of sequence diversity in this population in the 5' UTR (Region 1) coupled with more positive values of Tajima's D are consistent with these earlier findings. Such population bottlenecks can exaggerate the effects of genetic drift through which the *Hopscotch* allele may have risen to high frequency entirely by chance. A bottleneck in San Lorenzo, however, does not explain the high frequency of the *Hopscotch* in multiple populations in the Jalisco cluster. Moreover, available information on diversity and population structure among Jaliscan populations (Hufford, 2010; Pyhäjärvi et al., 2013) is not suggestive of recent colonization or other demographic events that would predict a high frequency of the allele across populations. Finally, diversity values in the 5' UTR of *tb1* are suggestive of natural selection acting upon the gene in populations of *parviglumis*. Overall nucleotide diversity is 76% less than seen in the sequences from the 66kb upstream region, and Tajima's D is considerably lower and consistently negative across populations (Table 2). In fact, values of Tajima's D in the 5' UTR are toward the extreme negative end of the distribution of this statistic previously calculated across loci sequenced in *parviglumis* (Wright et al., 2005; Moeller et al., 2007). Though not definitive, these results are consistent with the action of selection on the upstream region of *tb1*, perhaps suggesting an ecological role for the gene in Jaliscan populations of *parviglumis*.



1 Significant effects of the *Hopscotch* insertion on lateral branch length, number of cupules, and  
 2 tillering index in domesticated maize have been well documented (Studer et al., 2011). Weber  
 3 et al. (2007) described significant phenotypic associations between markers in and around *tb1* and  
 4 lateral branch length and female ear length in a sample from 74 natural populations of  
 5 *parviglumis* (Weber et al., 2007); however, these data did not include markers from the *Hopscotch*  
 6 region 66kb upstream of *tb1*. Our study is the first to explicitly examine the phenotypic effects of  
 7 the *Hopscotch* insertion across a wide collection of individuals sampled from natural populations  
 8 of teosinte. We have found no significant effect of the *Hopscotch* insertion on tillering index or  
 9 tiller number, a result that is discordant with its clear phenotypic effects in maize. One  
 10 interpretation of this result would be that the *Hopscotch* controls tillering in maize (Studer et al.,  
 11 2011), but tillering in teosinte is affected by variation at other loci. Consistent with this  
 12 interpretation, *tb1* is thought to be part of a complex pathway controlling branching, tillering and  
 13 other phenotypic traits (Kebrom and Brutnell, 2007; Clark et al., 2006).

14 A recent study by Studer and Doebley (2012) examined variation across traits in a three-taxa  
 15 allelic series at the *tb1* locus. Studer and Doebley (2012) introgressed nine unique teosinte *tb1*  
 16 segments (one from *Zea diploperennis*, and four each from *mexicana* and *parviglumis*) into an  
 17 inbred maize background and investigated their phenotypic effects. Phenotypes were shown to  
 18 cluster by taxon, indicating *tb1* may underlie morphological diversification of *Zea*. Additional  
 19 analysis in Studer and Doebley (2012) suggested tillering index was controlled both by *tb1* and  
 20 loci elsewhere in the genome. Clues to the identity of these loci may be found in QTL studies  
 21 that have identified loci controlling branching architecture (e.g., Doebley and Stec 1991, 1993).  
 22 Many of these loci (*grassy tillers*, *gt1*; *tassel-replaces-upper-ears1*, *tru1*; *terminal ear1*, *te1*) have  
 23 been shown to interact with *tb1* (Whipple et al., 2011; Li, 2012), and both *tru1* and *te1* affect the  
 1 same phenotypic traits as *tb1* (Doebley et al., 1995). *tru1*, for example, has been shown to act  
 2 either epistatically or downstream of *tb1*, affecting both branching architecture (decreased apical  
 3 dominance) and tassel phenotypes (shortened tassel and shank length and reduced tassel number;  
 4 Li 2012). Variation in these additional loci may have affected tillering in our collections and  
 5 contributed to the lack of correlation we see between *Hopscotch* genotype and tillering.

6 In conclusion, our findings demonstrate that the *Hopscotch* allele is widespread in populations  
 7 of *parviglumis* and *mexicana* and occasionally at high allele frequencies. Analysis of linkage using  
 8 SNPs from across chromosome 1 does not suggest that the *Hopscotch* allele is present in these  
 9 populations due to recent introgression, and it seems unlikely that the insertion would have

10 drifted to high frequency in multiple populations. We do, however, find preliminary evidence of  
 11 selection on the *tb1* locus in *parviglumis*. Coupled with our observation of high frequency of the  
 12 *Hopscotch* insertion in a number of populations, this suggests that the locus may play an  
 13 ecological role in teosinte.

14 In contrast to domesticated maize, the *Hopscotch* insertion does not appear to have a large  
 15 effect on tillering in a diverse sample of *parviglumis* from a natural population and the phenotypic  
 16 consequences of variation at *tb1* thus remain unclear. Future studies should examine expression  
 17 levels of *tb1* in teosinte with and without the *Hopscotch* insertion and further characterize the  
 18 effects of additional loci involved in branching architecture (e.g. *gt1*, *tru1*, and *te1*). These data,  
 19 in conjunction with more exhaustive phenotyping, should help to further clarify the ecological  
 20 significance of the domesticated *tb1* allele in natural populations of teosinte.



# LITERATURE CITED

- 21
- 22 BAACK, E., Y. SAPIR, M. CHAPMAN, J. BURKE, AND L. RIESEBERG. 2008. Selection on
- 23 domestication traits and quantitative trait loci in crop-wild sunflower hybrids. *Mol Ecol* 17:
- 24 666–677.
- 25 BARRETT, S. 1983. Crop mimicry in weeds. *Econ Bot* 37: 255–282.
- 26 BRADBURY, P., Z. ZHANG, D. KROON, T. CASSTEVEN, Y. RAMDOSS, AND E. BUCKLER.
- 27 2007. Tassel: software for association mapping of complex traits in diverse samples.
- 28 *Bioinformatics* 23: 2633–2635.
- 29 BRIGGS, W., M. McMULLEN, B. GAUT, AND J. DOEBLEY. 2007. Linkage mapping of
- 1 domestication loci in a large maize-teosinte backcross resource. *Genetics* 177: 1915–1928.
- 2 CHIA, J., C. SONG, P. BRADBURY, D. COSTICH, N. DE, LEON, J. DOEBLEY, R. ELSHIRE,
- 3 B. GAUT, L. GELLER, J. GLAUBITZ, M. GORE, K. GUILL, J. HOLLAND, M. HUFFORD,
- 4 J. LAI, M. LI, X. LIU, Y. LU, R. McCOMBIE, R. NELSON, J. POLAND, B. PRASANNA,
- 5 T. PYHÄJÄRVI, T. RONG, R. SEKHON, Q. SUN, M. TENAILLON, F. TIAN, J. WANG, X. XU,
- 6 Z. ZHANG, S. KAEPPLE, J. ROSS-IBARRA, M. McMULLEN, E. BUCKLER, G. ZHANG,
- 7 Y. XU, AND D. WARE. 2012. Maize hapmap2 identifies extant variation from a genome in flux.
- 8 *Nat Genet* 44: 803–U238.
- 9 CLARK, R., T. WAGLER, P. QUIJADA, AND J. DOEBLEY. 2006. A distant upstream enhancer at
- 10 the maize domestication gene *tb1* has pleiotropic effects on plant and inflorescent architecture.
- 11 *Nat Genet* 38: 594–597.
- 12 COLOSIMO, P., K. HOSEMAN, S. BALABHADRA, G. VILLARREAL, M. DICKSON,
- 13 J. GRIMWOOD, J. SCHMUTZ, R. MYERS, D. SCHLUTER, AND D. KINGSLEY. 2005.
- 14 Widespread parallel evolution in sticklebacks by repeated fixation of ectodysplasin alleles.
- 15 *Science* 307: 1928–1933.
- 16 COOK, J., M. McMULLEN, J. HOLLAND, F. TIAN, P. BRADBURY, J. ROSS-IBARRA,
- 17 E. BUCKLER, AND S. FLINT-GARCIA. 2012. Genetic architecture of maize kernel composition
- 18 in the nested association mapping and inbred association panels. *Plant Physiol* 158: 824–834.
- 19 COOP, G., D. WITONSKY, A. DI, RIENZO, AND J. PRITCHARD. 2010. Using environmental
- 20 correlations to identify loci underlying local adaptation. *Genetics* 185: 1411–1423.

- 21 DOEBLEY, J. 2004. The genetics of maize evolution. *Annu Rev Genet* 38: 37–59.
- 22 DOEBLEY, J. AND A. STEC. 1991. Genetic-analysis of the morphological differences between  
23 maize and teosinte. *Genetics* 129: 285–295.
- 24 DOEBLEY, J. AND A. STEC. 1993. Inheritance of the morphological differences between maize  
25 and teosinte: Comparison of results for two F<sub>2</sub> populations. *Genetics* 134: 559–570.
- 26 DOEBLEY, J., A. STEC, AND C. GUSTUS. 1995. *teosinte branched1* and the origin of maize:  
27 Evidence for epistasis and the evolution of dominance. *Genetics* 141: 333–346.
- 1 DOEBLEY, J., A. STEC, AND L. HUBBARD. 1997. The evolution of apical dominance in maize.  
2 *Nature* 386: 485–488.
- 3 DOYLE, J. AND J. DOYLE. 1990. A rapid total dna preparation procedure for small quantities of  
4 fresh tissue. *Phytochemical Bulletin* 19: 11–15.
- 5 ELLSTRAND, N., L. GARNER, S. HEGDE, R. GUADAGNUOLO, AND L. BLANCAS. 2007.  
6 Spontaneous hybridization between maize and teosinte. *Journal of Heredity* 98: 183–187.
- 7 ELLSTRAND, N., H. PRENTICE, AND J. HANCOCK. 1999. Gene flow and introgression from  
8 domesticated plants into their wild relatives. *Annu Rev Ecol Syst* 30: 539–563.
- 9 ELLSTRAND, N. C., S. M. HEREDIA, J. A. LEAK-GARCIA, J. M. HERATY, J. C. BURGER,  
10 L. YAO, S. NOHZADEH-MALAKSHAH, AND C. E. RIDLEY. 2010. Crops gone wild: evolution of  
11 weeds and invasives from domesticated ancestors. *Evolutionary Applications* 3: 494–504.
- 12 FALUSH, D., M. STEPHENS, AND J. PRITCHARD. 2003. Inference of population structure using  
13 multilocus genotype data: Linked loci and correlated allele frequencies. *Genetics* 164:  
14 1567–1587.
- 15 FAO/IIASA/ISRIC/ISSCAS/JRC. 2012. Harmonized World Soil Database, version 1.2. FAO,  
16 Rome, Italy and IIASA, Laxenburg, Austria.
- 17 FEDER, J., S. BERLOCHER, J. ROETHELE, H. DAMBROSKI, J. SMITH, W. PERRY,  
18 V. GAVRILOVIC, K. FILCHAK, J. RULL, AND M. ALUJA. 2003. Allopatric genetic origins for  
19 sympatric host-plant shifts and race formation in *rhagoletis*. *P Natl Acad Sci Usa* 100:  
20 10314–10319.

- 21 FLINT-GARCIA, S. A., A. L. BODNAR, AND M. P. SCOTT. 2009. Wide variability in kernel  
22 composition, seed characteristics, and zein profiles among diverse maize inbreds, landraces, and  
23 teosinte. *Theoretical and applied genetics* 119: 1129–1142.
- 24 FOX, J. AND S. WEISBERG. 2011. An R Companion to Applied Regression, vol. Second Edition.  
25 Sage, Thousand Oaks, CA.
- 26 FUKUNAGA, K., T. NUSSBAUM-WAGLER, B. LI, Q. ZHAO, Y. VIGOUROUX, M. FALLER,  
27 K. BOMBLIES, L. LUKENS, AND J. DOEBLEY. 2005. Genetic diversity and population  
28 structure of teosinte. *Genetics* 169: 2241–2254.
- 1 GALLAVOTTI, A., Q. ZHAO, J. KYOZUKA, R. MEELEY, M. RITTER, J. DOEBLEY, M. PE, AND  
2 R. SCHMIDT. 2004. The role of barren stalk1 in the architecture of maize. *Nature* 432: 630–635.
- 3 GERKE, J., J. EDWARDS, G. KE, J. ROSS-IBARRA, AND M. McMULLEN. 2013. The genomic  
4 impacts of drift and selection for hybrid performance in maize. *arXiv* 1307.7313.
- 5 GOUDET, J. 2005. Hierfstat, a package for r to compute and test hierarchical f-statistics. *Mol*  
6 *Ecol Notes* 5: 184–186.
- 7 HUBNER, S., T. GUNTHER, A. FLAVELL, E. FRIDMAN, A. GRANER, A. KOROL, AND  
8 K. SCHMID. 2012. Islands and streams: clusters and gene flow in wild barley populations from  
9 the levant. *Mol Ecol* 21: 1115–1129.
- 10 HUFFORD, M. 2010. Genetic and ecological approaches to guide conservation of teosinte (zea  
11 mays ssp. parviglumis), the wild progenitor of maize. *PhD Dissertation* : 130pp.
- 12 HUFFORD, M., P. BILINSKI, T. PYHÄJÄRVI, AND J. ROSS-IBARRA. 2012a. Teosinte as a model  
13 system for population and ecological genomics. *Trends in Genetics* 12: 606–615.
- 14 HUFFORD, M., P. LUBINSKY, T. PYHÄJÄRVI, M. DEVENGENDO, N. ELLSTRAND, AND  
15 J. ROSS-IBARRA. 2013. The genomic signature of crop-wild introgression in maize. *PLoS*  
16 *Genetics* 9: e1003477.
- 17 HUFFORD, M., X. XU, J. VAN, HEERWAARDEN, T. PYHÄJÄRVI, J. CHIA, R. CARTWRIGHT,  
18 R. ELSHIRE, J. GLAUBITZ, K. GUILL, S. KAEPLER, J. LAI, P. MORRELL, L. SHANNON,  
19 C. SONG, N. SPRINGER, R. SWANSON-WAGNER, P. TIFFIN, J. WANG, G. ZHANG,  
20 J. DOEBLEY, M. McMULLEN, D. WARE, E. BUCKLER, S. YANG, AND J. ROSS-IBARRA.

- 21 2012b. Comparative population genomics of maize domestication and improvement. *Nat Genet*  
22 44: 808–U118.
- 23 KEARSE, M., R. MOIR, A. WILSON, S. STONES-HAVAS, M. CHEUNG, S. STURROCK,  
24 S. BUXTON, A. COOPER, S. MARKOWITZ, C. DURAN, T. THIERER, B. ASHTON,  
25 P. MEINTJES, AND A. DRUMMOND. 2012. Geneious basic: An integrated and extendable  
26 desktop software platform for the organization and analysis of sequence data. *Bioinformatics*  
27 28: 1647–1649.
- 1 KEBROM, T. AND T. BRUTNELL. 2007. The molecular analysis of the shade avoidance syndrome  
2 in the grasses has begun. *Journal of Experimental Botany* 58: 3079–3089.
- 3 KITANO, J., D. BOLNICK, D. BEAUCHAMP, M. MAZUR, S. MORI, T. NAKANO, AND  
4 C. PEICHEL. 2008. Reverse evolution of armor plates in the threespine stickleback. *Curr Biol*  
5 18: 769–774.
- 6 KOVACH, M. AND S. MCCOUCH. 2008. Leveraging natural diversity: back through the  
7 bottleneck. *Genome studies and Molecular Genetics* 11: 193–200.
- 8 LI, W. 2012. Tassels replace upper ears1 encodes a putative transcription factor that regulates  
9 maize shoot architecture by multiple pathways. *PhD Dissertation* : 122.
- 10 LUKENS, L. AND J. DOEBLEY. 1999. Epistatic and environmental interactions for quantitative  
11 trait loci involved in maize evolution. *Genet Res* 74: 291–302.
- 12 MALOOF, M., K. SOLIMAN, R. JORGENSEN, AND R. ALLARD. 1984. Ribosomal dna spacer  
13 length polymorphisms in barley - mendelian inheritance, chromosomal location, and population  
14 dynamics. *P Natl Acad Sci Usa* 81: 8014–8018.
- 15 MATSUOKA, Y., Y. VIGOUROUX, M. GOODMAN, G. SANCHEZ, E. BUCKLER, AND  
16 J. DOEBLEY. 2002. A single domestication for maize shown by multilocus microsatellite  
17 genotyping. *P Natl Acad Sci Usa* 99: 6080–6084.
- 18 MOELLER, D. A., M. I. TENAILLON, AND P. TIFFIN. 2007. Population structure and its effects  
19 on patterns of nucleotide polymorphism in teosinte (*zea mays* ssp. *parviglumis*). *Genetics* 176:  
20 1799–1809.

- 21 OLSEN, K. AND B. GROSS. 2010. Genetic perspectives on crop domestication. *Trends in Plant*  
22 *Science* 15: 529–537.
- 23 OLSEN, K. M. AND J. F. WENDEL. 2013. A bountiful harvest: Genomic insights into crop  
24 domestication phenotypes. *Annual Review of Plant Biology* 64: 47–70.
- 25 PIPERNO, D., A. RANERE, I. HOLST, J. IRIARTE, AND R. DICKAU. 2009. Starch grain and  
26 phytolith evidence for early ninth millennium bp maize from the central balsas river valley,  
1 mexico. *P Natl Acad Sci Usa* 106: 5019–5024.
- 2 PLANTINGA, T., S. ALONSO, N. IZAGIRRE, M. HERVELLA, R. FREGEL, J. VAN DER MEER,  
3 M. NETEA, AND C. DE LA RUA. 2012. Low prevalence of lactase persistence in neolithic  
4 south-west europe. *Eur J Hum Genet* 20: 778–782.
- 5 PYHÄJÄRVI, T., M. HUFFORD, AND J. ROSS-IBARRA. 2013. Complex patterns of local  
6 adaptation in the wild relatives of maize. *Genome Biology and Evolution* 5: 1594–1609.
- 7 ROSS-IBARRA, J., P. MORRELL, AND B. GAUT. 2007. Plant domestication, a unique  
8 opportunity to identify the genetic basis of adaptation. *P Natl Acad Sci Usa* 104: 8641–8648.
- 9 ROSS-IBARRA, J., M. TENAILLON, AND B. GAUT. 2009. Historical divergence and gene flow in  
10 the genus *zea*. *Genetics* 181: 1399–1413.
- 11 ROZEN, S. AND H. SKALETISKY. 2000. Primer3 on the www for general users and for biologist  
12 programmers. *Methods in Molecular Biology* : 365–386.
- 13 SIGMON, B. AND E. VOLLBRECHT. 2010. Evidence of selection at the *ramosa1* locus during  
14 maize domestication. *Mol Ecol* 19: 1296–1311.
- 15 STUDER, A. AND J. DOEBLEY. 2012. Evidence for a natural allelic series at the maize  
16 domestication locus *teosinte branched1*. *Genetics* 19: 951–958.
- 17 STUDER, A., Q. ZHAO, J. ROSS-IBARRA, AND J. DOEBLEY. 2011. Identification of a functional  
18 transposon insertion in the maize domestication gene *tb1*. *Nat Genet* 43: 1160–U164.
- 19 THORNTON, K. 2003. libsequence: a c++ class library for evolutionary genetic analysis.  
20 *Bioinformatics* 19: 2325–2327.

- 21 THURBER, C., M. REAGON, B. GROSS, K. OLSEN, Y. JIA, AND A. CAICEDO. 2010. Molecular  
22 evolution of shattering loci in us weedy rice. *Mol Ecol* 19: 3271–3284.
- 23 TISHKOFF, S., F. REED, A. RANCIARO, B. VOIGHT, C. BABBITT, J. SILVERMAN, K. POWELL,  
24 H. MORTENSEN, J. HIRBO, M. OSMAN, M. IBRAHIM, S. OMAR, G. LEMA, T. NYAMBO,  
25 J. GHORI, S. BUMPSTEAD, J. PRITCHARD, G. WRAY, AND P. DELOUKAS. 2007. Convergent  
26 adaptation of human lactase persistence in africa and europe. *Nat Genet* 39: 31–40.
- 27 VAN HEERWAARDEN, J., J. DOEBLEY, W. BRIGGS, J. GLAUBITZ, M. GOODMAN,  
558 J. GONZALEZ, AND J. ROSS-IBARRA. 2011. Genetic signals of origin, spread, and introgression  
559 in a large sample of maize landraces. *P Natl Acad Sci Usa* 108: 1088–1092.
- 560 WARBURTON, M. L., W. GARRISON, S. TABA, A. CHARCOSSET, C. MIR, F. DUMAS,  
561 D. MADUR, S. DREISIGACKER, C. BEDOYA, B. PRASANNA, C. XIE, S. HEARNE, AND  
562 J. FRANCO. 2011. Gene flow among different teosinte taxa and into the domesticated maize  
563 gene pool. *Genetic Resources and Crop Evolution* 58: 1243–1261.
- 564 WEBER, A., R. CLARK, L. VAUGHN, J. SANCHEZ-GONZALEZ, J. YU, B. YANDELL,  
565 P. BRADBURY, AND J. DOEBLEY. 2007. Major regulatory genes in maize contribute to  
566 standing variation in teosinte (*zea mays* ssp *parviglumis*). *Genetics* 177: 2349–2359.
- 567 WHIPPLE, C., T. KEBROM, A. WEBER, F. YANG, D. HALL, R. MEELEY, R. SCHMIDT,  
568 J. DOEBLEY, T. BRUTNELL, AND D. JACKSON. 2011. grassy tillers1 promotes apical  
569 dominance in maize and responds to shade signals in the grasses. *P Natl Acad Sci Usa* 108:  
570 E506–E512.
- 571 WILKES, H. 1977. Hybridization of maize and teosinte, in mexico and guatemala and the  
572 improvement of maize. *Economic Botany* 31: 254–293.
- 573 WRIGHT, S. I., I. V. BI, S. G. SCHROEDER, M. YAMASAKI, J. F. DOEBLEY, M. D.  
574 McMULLEN, AND B. S. GAUT. 2005. The effects of artificial selection on the maize genome.  
575 *Science* 308: 1310–1314.
- 576 ZHANG, L., Q. ZHU, Z. WU, J. ROSS-IBARRA, B. GAUT, S. GE, AND T. SANG. 2009. Selection  
577 on grain shattering genes and rates of rice domestication. *New Phytol* 184: 708–720.

Table 1. Pairwise  $F_{ST}$  values from sequence and *Hopscotch* genotyping data

| Comparison  | Region 1 | Region 2 | <i>Hopscotch</i> |
|-------------|----------|----------|------------------|
| EjuA & EjuB | 0        | 0        | 0                |
| EjuA & MSA  | 0.326    | 0.328    | 0.186            |
| EjuA & SLO  | 0.416    | 0.258    | 0.280            |
| EjuB & MSA  | 0.397    | 0.365    | 0.188            |
| EjuB & SLO  | 0.512    | 0.290    | 0.280            |
| MSA & SLO   | 0.007    | 0        | 0.016            |

Table 2. Population genetic statistics from resequenced regions near the *tb1* locus

| Population                      | # Haplotypes | Hap. Diversity | $\hat{\theta}_{\pi}$ | Tajima's D |
|---------------------------------|--------------|----------------|----------------------|------------|
| <i>Region 1 (5' UTR)</i>        |              |                |                      |            |
| EJUA                            | 8            | 0.859          | 0.005                | -1.650     |
| EJUB                            | 5            | 0.709          | 0.004                | -1.831     |
| MSA                             | 6            | 0.682          | 0.004                | -1.755     |
| SLO                             | 3            | 0.318          | 0.001                | -0.729     |
| <i>Region 2 (66kb upstream)</i> |              |                |                      |            |
| EJUA                            | 8            | 0.894          | 0.018                | 0.623      |
| EJUB                            | 8            | 0.894          | 0.016                | 0.295      |
| MSA                             | 3            | 0.682          | 0.011                | -0.222     |
| SLO                             | 4            | 0.742          | 0.014                | 0.932      |

Table 3. mean  $r^2$  values between SNPs on chromosome 1, in the broad *tb1* region, within the 5' UTR of *tb1* (Region 1), and 66kb upstream of *tb1* (Region 2).

| Population  | Chr. 1 | <i>tb1</i> region | Region 1 | Region 2 |
|-------------|--------|-------------------|----------|----------|
| Ejutla A    | 0.095  | 0.050             | 0.747    | 0.215    |
| Ejutla B    | 0.069  | 0.051             | 0.660    | 0.186    |
| La Mesa     | 0.070  | 0.053             | 0.914    | 0.766    |
| San Lorenzo | 0.101  | 0.067             | 0.912    | 0.636    |



Table 4. Assignments to maize and teosinte in the *tb1* and chromosome 1 regions from STRUC-  
TURE

| Population  | <i>tb1</i> region |          | Chr 1 |          |
|-------------|-------------------|----------|-------|----------|
|             | Maize             | Teosinte | Maize | Teosinte |
| Ejutla A    | 0.022             | 0.978    | 0.203 | 0.797    |
| Ejutla B    | 0.019             | 0.981    | 0.187 | 0.813    |
| La Mesa     | 0.012             | 0.988    | 0.193 | 0.807    |
| San Lorenzo | 0.016             | 0.984    | 0.205 | 0.795    |

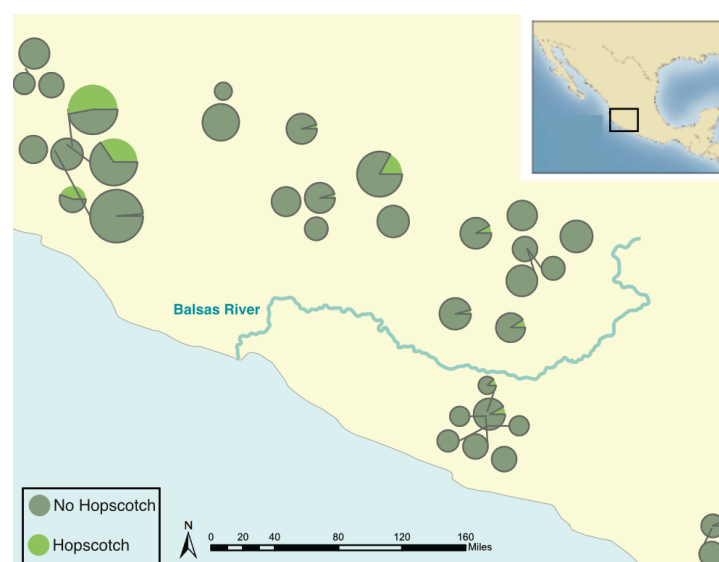

Figure 1. Map showing the frequency of the *Hopscotch* allele in populations of *parviglumis* where we sampled more than 6 individuals. Size of circles reflects number of alleles sampled. The Balsas River is shown, as the Balsas River Basin is believed to be the center of domestication of maize.

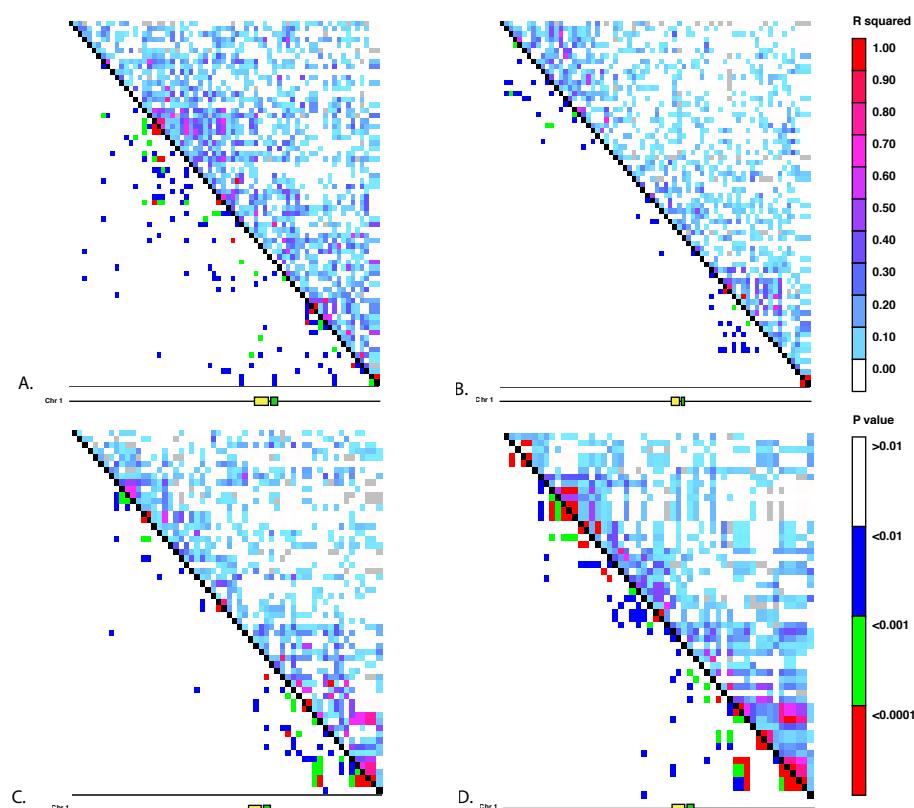

Figure 2. Linkage disequilibrium for SNPs in Mb 261-268 on chromosome 1. The yellow rectangle indicates the location of the *Hopscotch* insertion and the green represents the *tb1* ORF. A) Ejutla A; B) Ejutla B; C) La Mesa; D) San Lorenzo. The upper triangle above the black diagonal is colored based on the  $r^2$  value between SNPs while the bottom triangle is colored based on p-value for the corresponding  $r^2$  value.

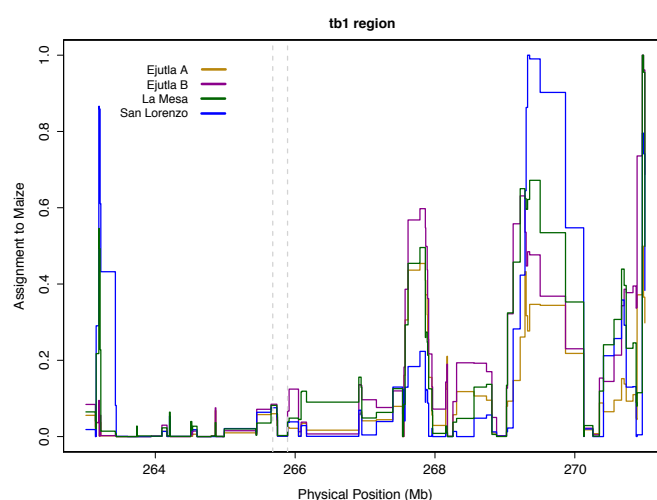

Figure 3. STRUCTURE assignment to maize across a section of chromosome 1. The dotted lines mark the beginning of the sequenced region 66kb upstream (Region 2) and the end of the *tb1* ORF.

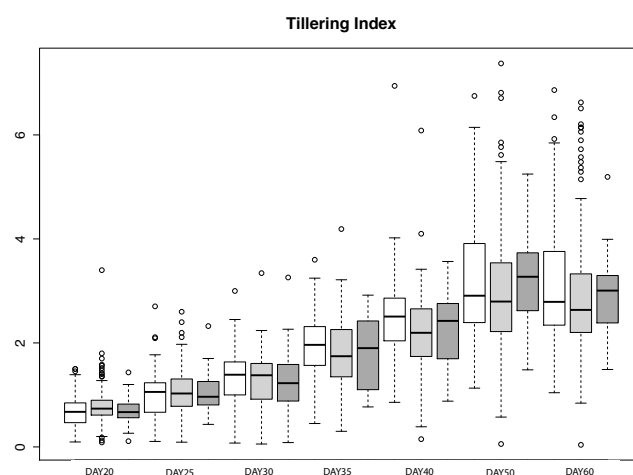

Figure 4. Box-plots showing tillering index in greenhouse grow-outs for phenotyping. White indicates individuals homozygous for the *Hopscotch*, light grey represents heterozygotes, and dark grey represents homozygotes for the teosinte (No *Hopscotch*) allele. Within boxes, dark black lines represent the median, and the edges of the boxes are the first and third quartiles. Outliers are displayed as dots, the maximum value excluding outliers is shown with the top whisker, while the minimum excluding outliers is shown with the bottom whisker.
